# Supplementary material for: Electronic-correlation induced sign-reversible Berry phase and quantum anomalous valley Hall effects in Janus monolayer OsClBr
Source: Royal Society of Chemistry journal article supplement (doi:10.1039/d3cp01504a), 2023-01-01
Supplement: d3cp01504a1.pdf [file d3cp01504a1.pdf]

## Supplemental Materials for “Electronic-correlation induced sign-reversible Berry phase and Quantum anomalous valley Hall effect in Janus monolayer OsClBr”

Kang Jia<sup>1</sup>, Xiao-Jing Dong<sup>1</sup>, Sheng-Shi Li<sup>2</sup>, Wei-Xiao Ji<sup>2</sup>, and Chang-Wen Zhang<sup>1,2\*</sup>

1. School of Physics and Physical Engineering, Qufu Normal University, Qufu, Shandong, 273100, PRC
2. School of Physics and Technology, Institute of Spintronics, University of Jinan, Jinan, Shandong, 250022, PRC

The purpose of this Supplemental Material is to provide additional information by means of some figures.

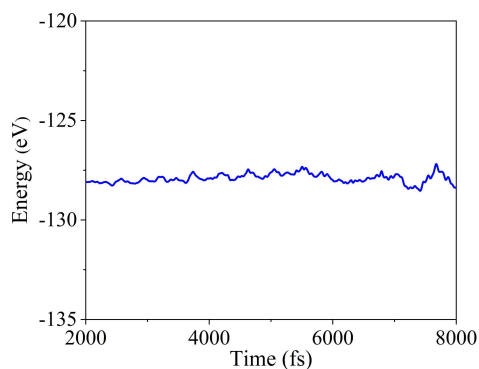

**Fig. S1** The AIMD simulation of OsClBr at 300 K.

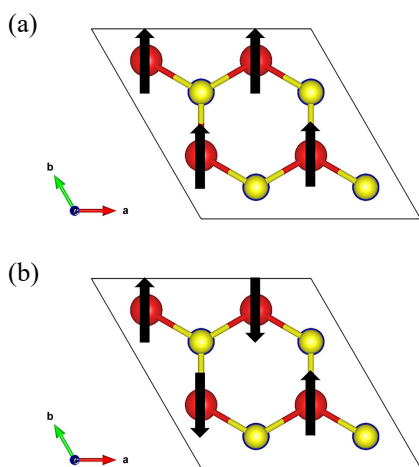

**Fig. S2** The considered magnetic configurations of OsClBr: panel (a) is for FM configuration, and panel (b) is for AFM configuration. The black arrows represent the direction of the magnetic moments.

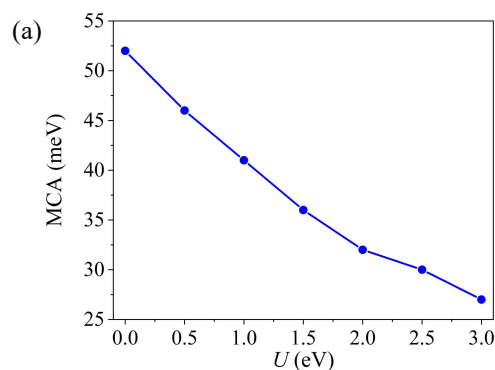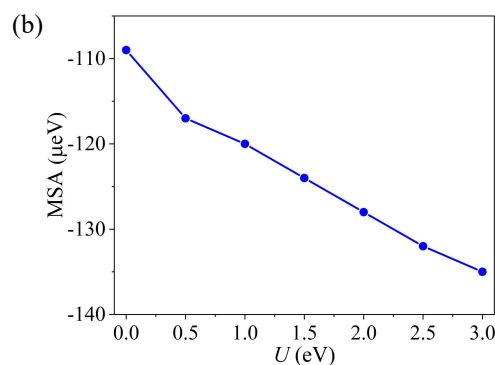

**Fig. S3** The calculated (a)  $E_{MCA}$  and (b)  $E_{MSA}$  as a function of  $U$  values.

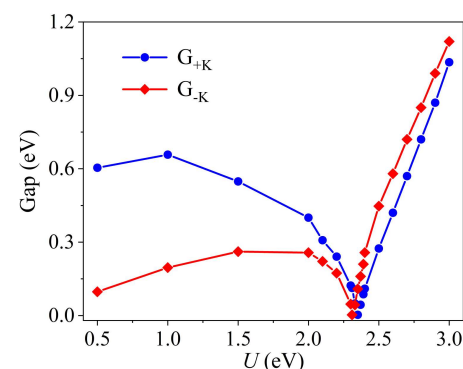

**Fig. S4** The band gaps at +K/-K points as a function of  $U$  values (0.5-3 eV).

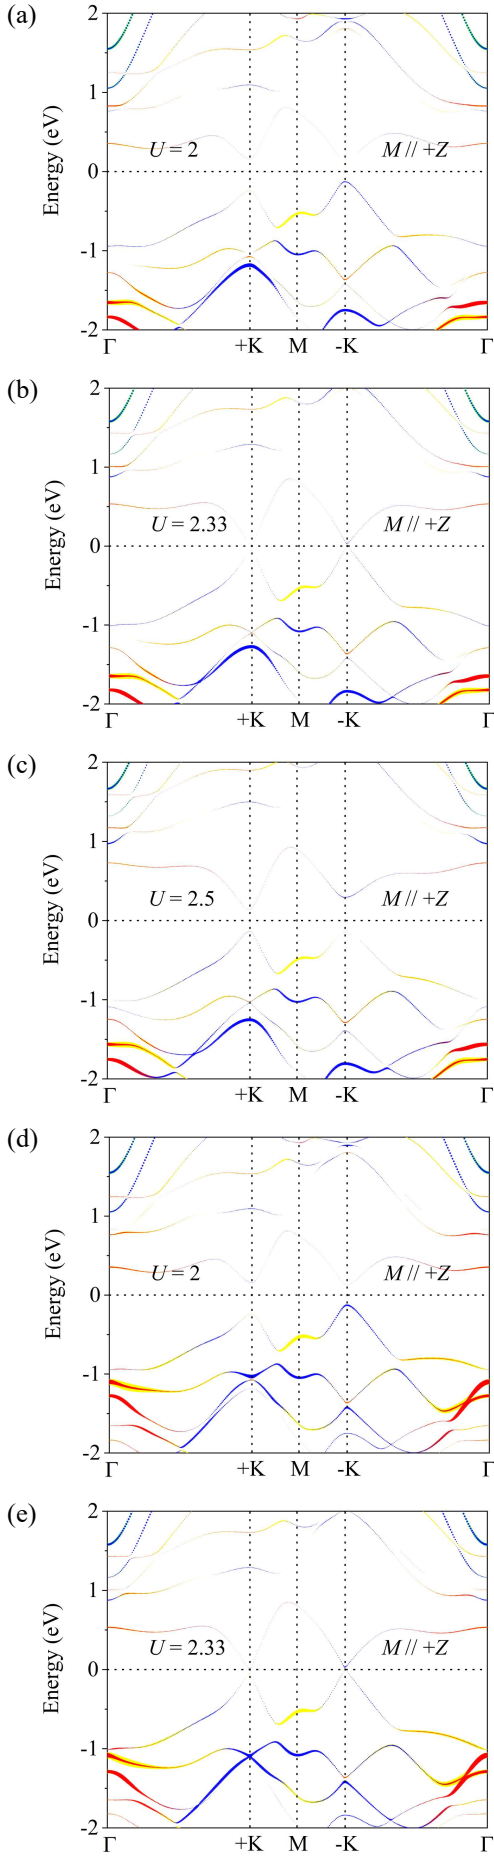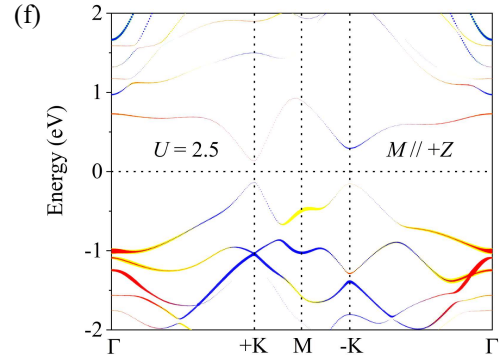

**Fig. S5** (a)-(c):The orbital-projected band structures of Cl atoms for OsClBr. (d)-(f):The orbital-projected band structures of Br atoms for OsClBr. The green, yellow, red, and blue symbols represent the orbital components of  $s$ ,  $p_x$ ,  $p_y$ , and  $p_z$  of Cl (Br), respectively.

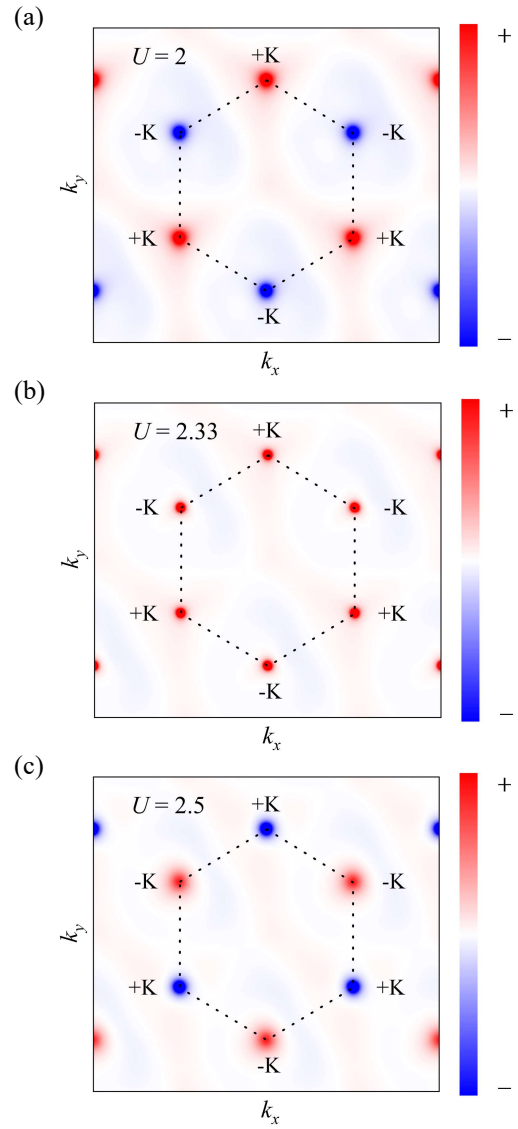

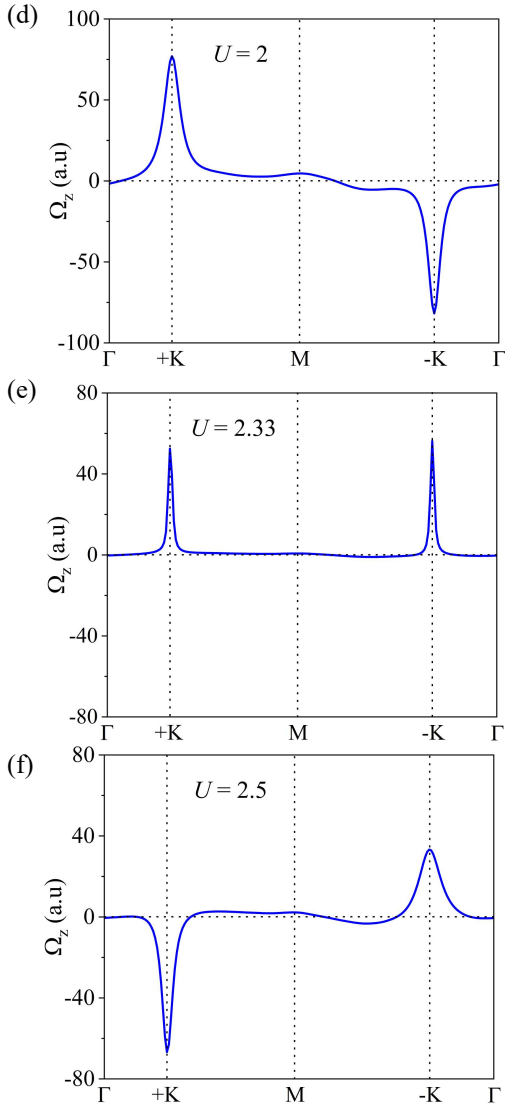

**Fig. S6** The Berry curvature of OsClBr in the 2D BZ with (a)  $U = 2$  eV, (b)  $U = 2.33$  eV, and (c)  $U = 2.5$  eV. The Berry curvature along the high symmetry points with (d)  $U = 2$  eV, (e)  $U = 2.33$  eV, and (f)  $U = 2.5$  eV.

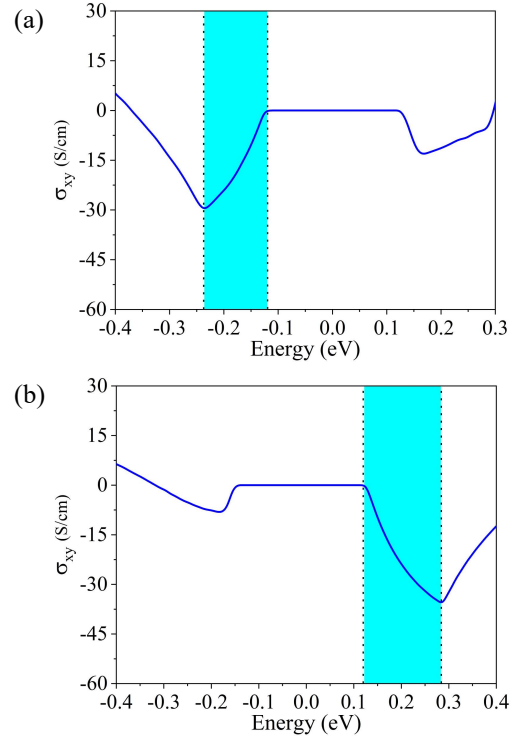

**Fig. S7** The AHC of (a)  $U = 2$  eV and (b)  $U = 2.5$  eV as a function of Fermi energy.

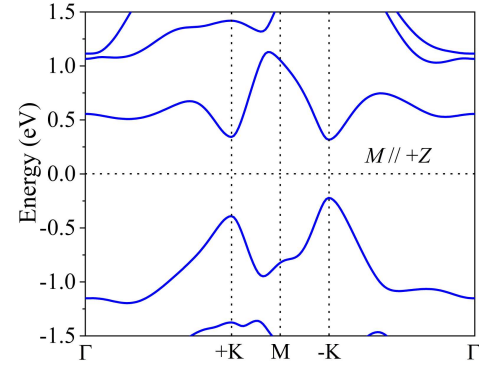

**Fig. S8** The band structure of OsClBr by HSE06+SOC with the magnetization direction of Os along +Z.

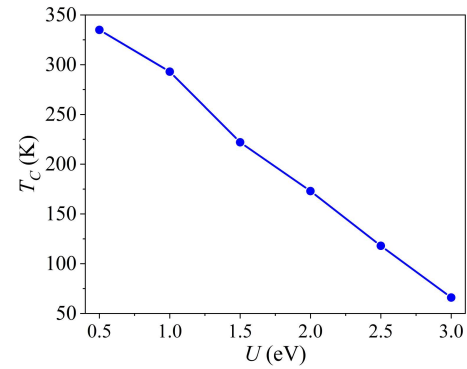

**Fig. S9** The  $T_C$  as a function of  $U$  values (0.5-3 eV).
